# Supplementary material for: Pseudomonas aeruginosa modulates neutrophil granule exocytosis in an in vitro model of airway infection
Source: PubMed Central journal article supplement — Immunol Cell Biol. 2022 Apr 11;100(5):352–70. doi: 10.1111/imcb.12547 (PMC9544492; doi:10.1111/imcb.12547), 2022-04-11
Supplement: IMCB-100-352-s001.pdf [file IMCB-100-352-s001.pdf]

**Supplemental Materials**

***Pseudomonas aeruginosa* modulates neutrophil granule exocytosis in an *in vitro* model of airway infection**

Daniel R Laucirica<sup>1,2</sup>, Craig J Schofield<sup>2</sup>, Samantha A McLean<sup>2</sup>, Camilla Margaroli<sup>3,4</sup>, Patricia Agudelo-Romero<sup>2</sup>, Stephen M Stick<sup>1,2,5</sup>, Rabindra Tirouvanziam<sup>6,7</sup>, Anthony Kicic<sup>1,2,5,8</sup>, and Luke W Garratt<sup>2</sup>, on behalf of WAERP<sup>2,5,9</sup> & AREST CF<sup>2,5,10,11</sup>

<sup>1</sup>Faculty of Health and Medical Sciences, University of Western Australia, Nedlands, WA, Australia

<sup>2</sup>Wal-Yan Respiratory Research Centre, Telethon Kids Institute, University of Western Australia, Nedlands, WA, Australia

<sup>3</sup>Department of Medicine, Division of Pulmonary, Allergy & Critical Care Medicine, University of Alabama at Birmingham, Birmingham, AL, USA

<sup>4</sup>Program in Protease and Matrix Biology, University of Alabama at Birmingham, Birmingham, AL, USA

<sup>5</sup>Department of Respiratory and Sleep Medicine, Perth Children's Hospital, Nedlands, WA, Australia

<sup>6</sup>Department of Pediatrics, Emory University, Atlanta, GA, USA

<sup>7</sup>Center for CF & Airways Disease Research, Children's Healthcare of Atlanta, Atlanta, GA, USA

<sup>8</sup>Occupation and Environment, School of Public Health, Curtin University, Bentley, WA, Australia

<sup>9</sup>St John of God Hospital, Subiaco, WA, Australia

<sup>10</sup>Murdoch Children's Research Institute, Melbourne, VIC, Australia

<sup>11</sup>Department of Paediatrics, University of Melbourne, Melbourne, VIC, Australia

Correspondence: Luke Garratt, [luke.garratt@telethonkids.org.au](mailto:luke.garratt@telethonkids.org.au)

| <b>Measured</b>                 |                                                  |                                  |                                                               |
|---------------------------------|--------------------------------------------------|----------------------------------|---------------------------------------------------------------|
| <b>GM-CSF</b>                   | granulocyte-macrophage colony-stimulating factor | <b>IP-10</b>                     | interferon gamma-induced protein 10                           |
| <b>SCF</b>                      | stem cell factor                                 | <b>PDGF-BB</b>                   | platelet-derived growth factor B subunits                     |
| <b>GRO-<math>\alpha</math></b>  | growth-regulated oncogene-alpha                  | <b>VEGF</b>                      | vascular endothelial growth factor                            |
| <b>MIF</b>                      | macrophage migration inhibitory factor           | <b>IL2-RA</b>                    | interleukin-2 receptor alpha chain                            |
| <b>IL-6</b>                     | interleukin 6                                    | <b>IL-16</b>                     | interleukin 16                                                |
| <b>TRAIL</b>                    | TNF-related apoptosis-inducing ligand            | <b><math>\beta</math>-NGF</b>    | beta-nerve growth factor                                      |
| <b>IL-9</b>                     | interleukin 9                                    | <b>Eotaxin</b>                   | N/A                                                           |
| <b>TNF-<math>\beta</math></b>   | tumor necrosis factor beta                       | <b>CTACK</b>                     | cutaneous T cell-attracting chemokine                         |
| <b>MIP-1<math>\beta</math></b>  | macrophage inflammatory protein-1 beta           | <b>IFN-<math>\alpha</math>2</b>  | interferon alpha-2                                            |
| <b>SDF-1<math>\alpha</math></b> | stromal cell-derived factor-1 alpha              | <b>IFN-<math>\gamma</math></b>   | interferon gamma                                              |
| <b>IL-2</b>                     | interleukin 2                                    | <b>LIF</b>                       | leukemia inhibitory factor                                    |
| <b>bFGF</b>                     | basic fibroblast growth factor                   | <b>MIG</b>                       | monokine induced by gamma interferon                          |
| <b>HGF</b>                      | hepatocyte growth factor                         | <b>RANTES</b>                    | regulated on activation, normal T cell expressed and secreted |
| <b>TNF-<math>\alpha</math></b>  | tumor necrosis factor alpha                      | <b>IL-8</b>                      | interleukin 8                                                 |
| <b>M-CSF</b>                    | macrophage colony-stimulating factor             | <b>IL-15</b>                     | interleukin 15                                                |
| <b>IL-18</b>                    | interleukin 18                                   | <b>MIP-1 <math>\alpha</math></b> | macrophage inflammatory protein-1 alpha                       |
| <b>IL-1<math>\alpha</math></b>  | interleukin 1 alpha                              | <b>MCP-1</b>                     | monocyte chemoattractant protein-1                            |
| <b>IL-1<math>\beta</math></b>   | interleukin 1 beta                               | <b>G-CSF</b>                     | granulocyte colony stimulating factor                         |
| <b>IL-1ra</b>                   | interleukin 1 receptor antagonist                | <b>SCGF-<math>\beta</math></b>   | stem cell growth factor beta                                  |
| <b>Undetectable</b>             |                                                  |                                  |                                                               |
| <b>IL-3</b>                     | interleukin 3                                    | <b>IL-12 p40</b>                 | interleukin 12 subunit beta                                   |
| <b>IL-4</b>                     | interleukin 4                                    | <b>IL-12 p70</b>                 | interleukin 12                                                |
| <b>IL-5</b>                     | interleukin 5                                    | <b>IL-13</b>                     | interleukin 13                                                |
| <b>IL-7</b>                     | interleukin 7                                    | <b>IL-17</b>                     | interleukin 17                                                |
| <b>IL-10</b>                    | interleukin 10                                   | <b>MCP-3</b>                     | monocyte chemotactic protein-3                                |

Supplementary table 1. Cytokine abbreviations

| Baseline (Uninfected) pg mL <sup>-1</sup> |              |              |                    |                  |                |                |            |            |            |                 |               |              |             |                |              |           |               |                |                 |  |
|-------------------------------------------|--------------|--------------|--------------------|------------------|----------------|----------------|------------|------------|------------|-----------------|---------------|--------------|-------------|----------------|--------------|-----------|---------------|----------------|-----------------|--|
|                                           | GM-CSF       | SCF*         | GRO-α              | MIF              | IL-6           | TRAIL          | IL-9       | TNF-β      | MIP-1β     | SDF-1α          | PDGF-BB       | VEGF         | IL2-RA      | IL-16          | β-NGF        | Eotaxin   | CTACK         | IFN-α2         | IFN-γ           |  |
| Non-CF                                    | 44.3 ± 20.2  | 110.7 ± 22.4 | 84062.5 ± 83675.6  | 12094.8 ± 4082.6 | 1546.5 ± 743.4 | 2234.3 ± 952.9 | 39.0 ± 7.2 | 4.6 ± 1.1  | 14.2 ± 2.0 | 66.7 ± 9.8      | 37.9 ± 3.7    | 213.4 ± 48.8 | 16.6 ± 1.4  | 54.1 ± 4.2     | 2.4 ± 0.7    | 0.4 ± 0.1 | 3.3 ± 0.9     | 9.2 ± 4.9      | 18.8 ± 11.2     |  |
|                                           | 120.0 ± 43.1 | 68.9 ± 14.6  | 286043.7 ± 19344.2 | 10771.7 ± 1155.9 | 537.1 ± 381.6  | 858.3 ± 367.8  | 34.6 ± 8.0 | 4.6 ± 0.4  | 13.9 ± 4.9 | 56.4 ± 7.2      | 34.2 ± 5.2    | 199.9 ± 13.6 | 12.3 ± 2.6  | 50.1 ± 5.4     | 2.3 ± 0.1    | 0.5 ± 0.2 | 2.5 ± 1.6     | 5.1 ± 1.4      | 35.9 ± 7.7      |  |
|                                           | LIF          | IL-2         | bFGF               | HGF              | TNF-α          | M-CSF*         | IL-18*     | IL-1α      | IL-1β      | IL-1ra          | IP-10         | MIG          | RANTES      | IL-8           | IL-15        | MIP-1 α   | MCP-1         | G-CSF          | SCGF-β          |  |
| Non-CF                                    | 152.8 ± 50.8 | 3.1 ± 1.3    | 13.7 ± 2.8         | 11.3 ± 3.4       | 30.4 ± 9.6     | 236.5 ± 94.9   | 16.4 ± 6.3 | 20.6 ± 7.7 | 5.2 ± 0.5  | 2313.0 ± 2128.4 | 254.6 ± 121.3 | 13.6 ± 8.4   | 17.4 ± 12.3 | 2316.2 ± 535.2 | 383.0 ± 16.7 | 0.5 ± 0.1 | 136.1 ± 97.2  | 1757.5 ± 838.6 | 3433.6 ± 1513.1 |  |
|                                           | 80.9 ± 59.4  | 3.2 ± 1.2    | 13.1 ± 1.3         | 12.2 ± 1.6       | 45.2 ± 30.6    | 61.8 ± 17.9    | 6.5 ± 1.6  | 23.9 ± 9.9 | 4.4 ± 0.9  | 4853.9 ± 1999.1 | 268.2 ± 59.0  | 20.2 ± 5.9   | 29.9 ± 10.7 | 1319.4 ± 396.9 | 402.0 ± 35.2 | 2.8 ± 5.2 | 141.2 ± 242.7 | 952.0 ± 881.5  | 2824.1 ± 1494.3 |  |

(\*p<0.05 non-CF vs CF uninfected washes, t-test)

**Supplementary table 2.** Baseline epithelial cytokine concentrations in pg mL<sup>-1</sup> (mean ± SD)

| Compound       | Description                                 | Use                                  | FDA Approval | Concentration            | Solvent                       | Reference |
|----------------|---------------------------------------------|--------------------------------------|--------------|--------------------------|-------------------------------|-----------|
| Azithromycin   | macrolide antibiotic                        | antimicrobial and anti-inflammatory  | Yes          | 1 $\mu\text{g mL}^{-1}$  | DMSO                          | 1         |
| IL-1Ra         | recombinant protein                         | IL-1 $\alpha$ and $\beta$ antagonist | Yes          | 2 $\mu\text{g mL}^{-1}$  | ddH <sub>2</sub> O + 0.1% BSA | 2         |
| Infliximab     | monoclonal antibody                         | TNF- $\alpha$ inhibitor              | Yes          | 50 $\mu\text{g mL}^{-1}$ | ddH <sub>2</sub> O            | 3         |
| LPS-RS         | LPS from <i>R. sphaeroides</i>              | TLR4 antagonist                      | No           | 5 $\mu\text{g mL}^{-1}$  | ddH <sub>2</sub> O            | 4         |
| TAK 242        | small molecule                              | TLR4 inhibitor                       | No           | 20 nM                    | DMSO                          | 5         |
| MCC950         | small molecule                              | NLRP3 inhibitor                      | No           | 1 $\mu\text{M}$          | DMSO                          | 6         |
| S(+)-ibuprofen | biologically active enantiomer of ibuprofen | COX-1 and 2 inhibitor                | Yes          | 1 mM                     | DMSO                          | 7         |

**Supplementary table 3.** Compounds for anti-GRIM drug screen

- 1) Ling KM, Hillas J, Lavender MA, Wrobel JP, Musk M, Stick SM, et al. Azithromycin reduces airway inflammation induced by human rhinovirus in lung allograft recipients. *Respirology*. 2019;24(12):1212-9.
- 2) Chen G, Sun L, Kato T, Okuda K, Martino MB, Abzhanova A, et al. IL-1beta dominates the promucin secretory cytokine profile in cystic fibrosis. *J Clin Invest*. 2019;129(10):4433-50.
- 3) Zhang C, Shu W, Zhou G, Lin J, Chu F, Wu H, et al. Anti-TNF-alpha Therapy Suppresses Proinflammatory Activities of Mucosal Neutrophils in Inflammatory Bowel Disease. *Mediators Inflamm*. 2018;2018:3021863.
- 4) Forrest OA, Ingersoll SA, Preininger MK, Laval J, Limoli DH, Brown MR, et al. Frontline Science: Pathological conditioning of human neutrophils recruited to the airway milieu in cystic fibrosis. *J Leukoc Biol*. 2018;104(4):665-75.
- 5) He GY, Zhao CH, Wu DG, Cheng H, Sun LA, Zhang DL, et al. S100A8 Promotes Inflammation via Toll-Like Receptor 4 After Experimental Traumatic Brain Injury. *Front Neurosci*. 2020;14:616559.
- 6) Coll RC, Robertson AA, Chae JJ, Higgins SC, Munoz-Planillo R, Inserra MC, et al. A small-molecule inhibitor of the NLRP3 inflammasome for the treatment of inflammatory diseases. *Nat Med*. 2015;21(3):248-55.
- 7) Hanna N, Graboski S, Laskin DL, Weinberger B. Effects of ibuprofen and hypoxia on neutrophil apoptosis in neonates. *Biol Neonate*. 2004;86(4):235-9.

| <u>Primer</u>                        | <u>Sequence</u>        | <u>Annealing Temp (°C)</u> | <u>Amplicon Size (bp)</u> |
|--------------------------------------|------------------------|----------------------------|---------------------------|
| Rhinovirus 5'UTR<br>Fwd              | CCTCCGGCCCCTGAAT       | 60                         | 316                       |
| Rhinovirus 5'UTR<br>Rev              | AAACACGGACACCCAAAGTAGT | 60                         |                           |
| <i>P. aeruginosa</i> 16S<br>rRNA Fwd | GGAGAAAGTGGGGGATCTTC   | 60                         | 117                       |
| <i>P. aeruginosa</i> 16S<br>rRNA Rev | CCGGTGCTTATTCTGTTGGT   | 60                         |                           |

**Supplementary table 4.** Primers for RV and Pa quantification

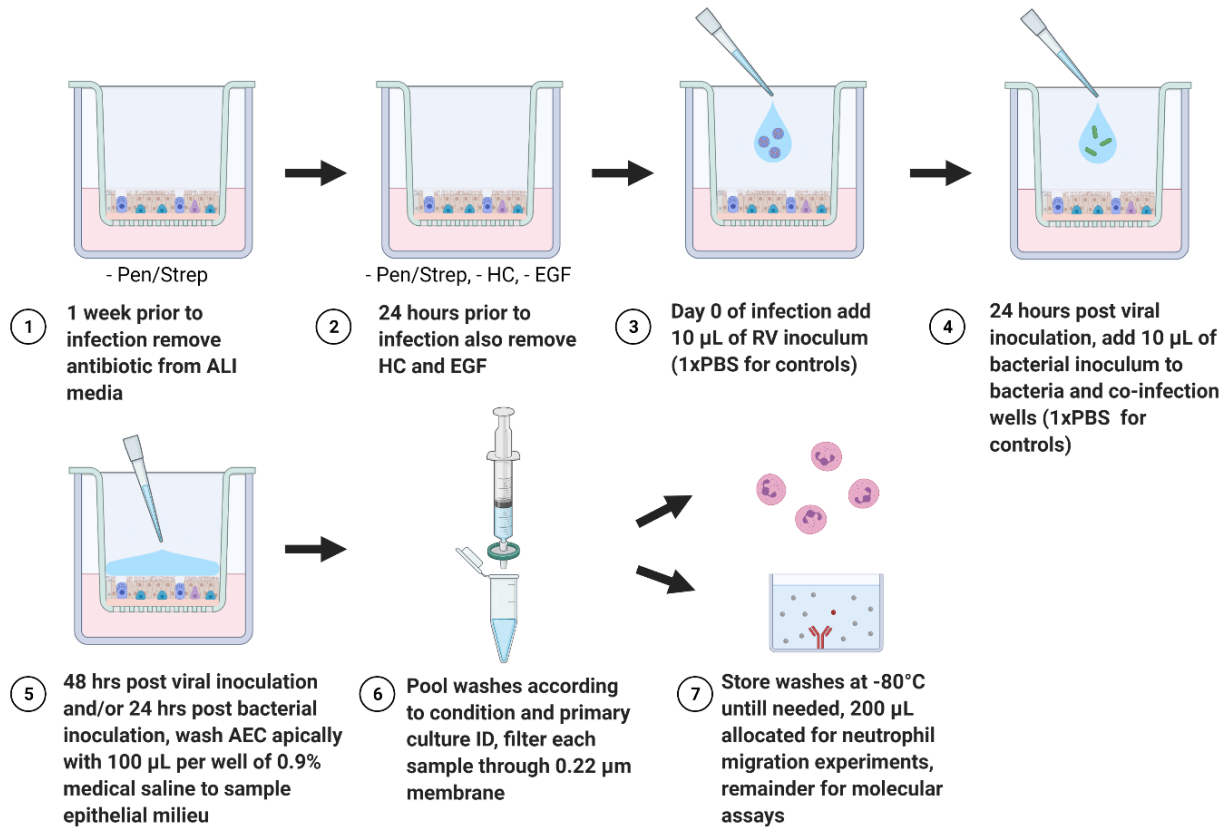

**Supplementary figure 1. Timeline of *in vitro* AEC infections** (Created with BioRender.com)

(AEC) airway epithelial cell, (ALI) air liquid interface, (Pen/Strep) penicillin/streptomycin, (HC) hydrocortisone, (EGF) epidermal growth factor, (PBS) Phosphate Buffered Saline

(a)

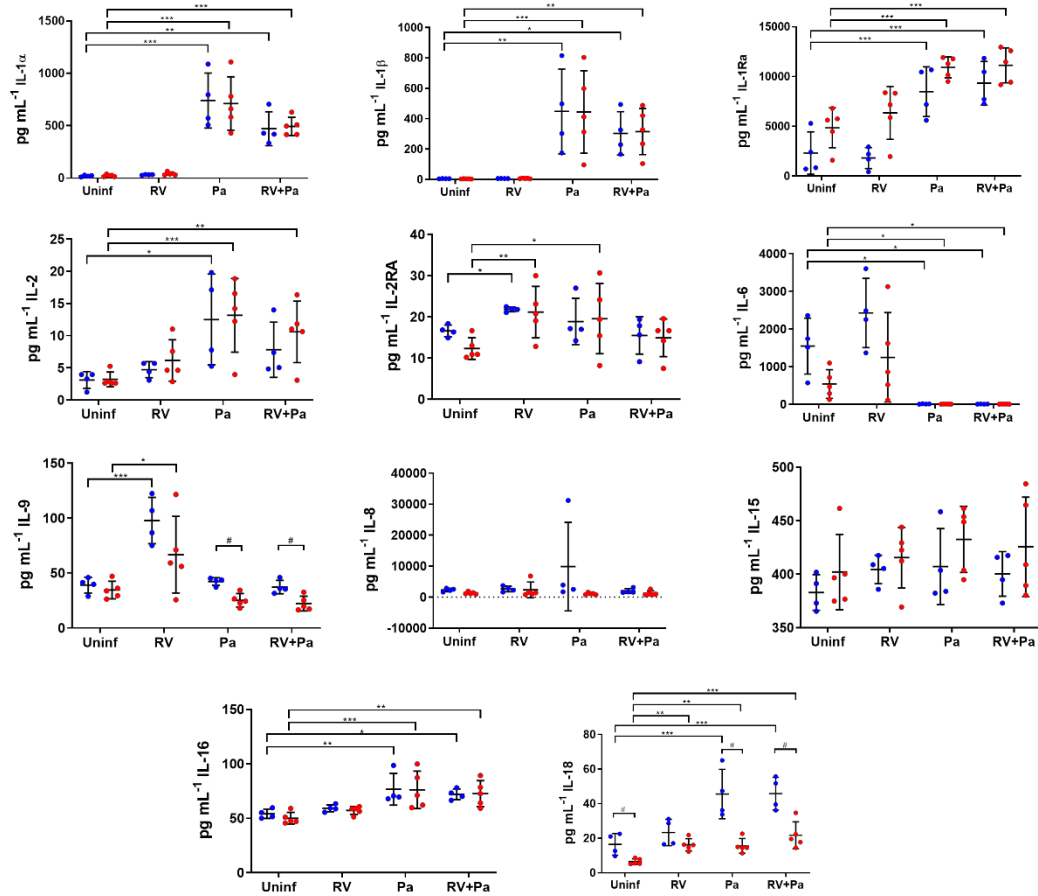

(b)

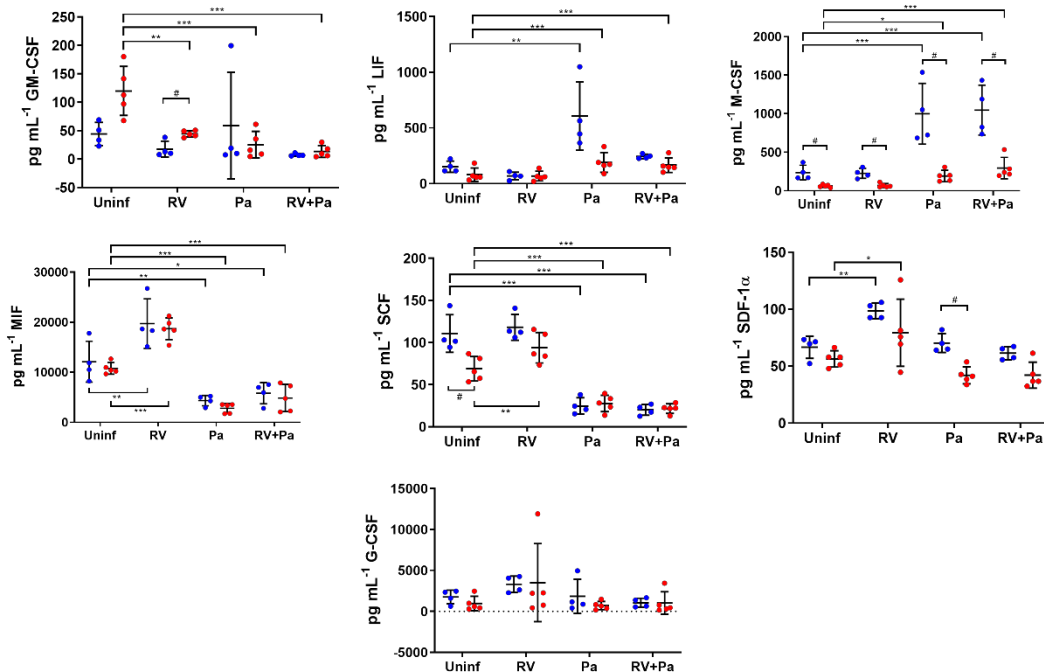

(c)

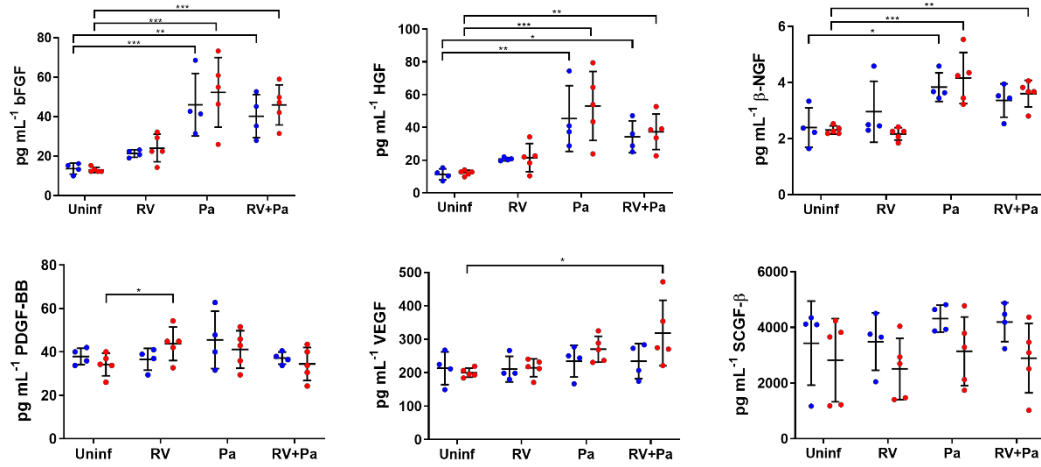

(d)

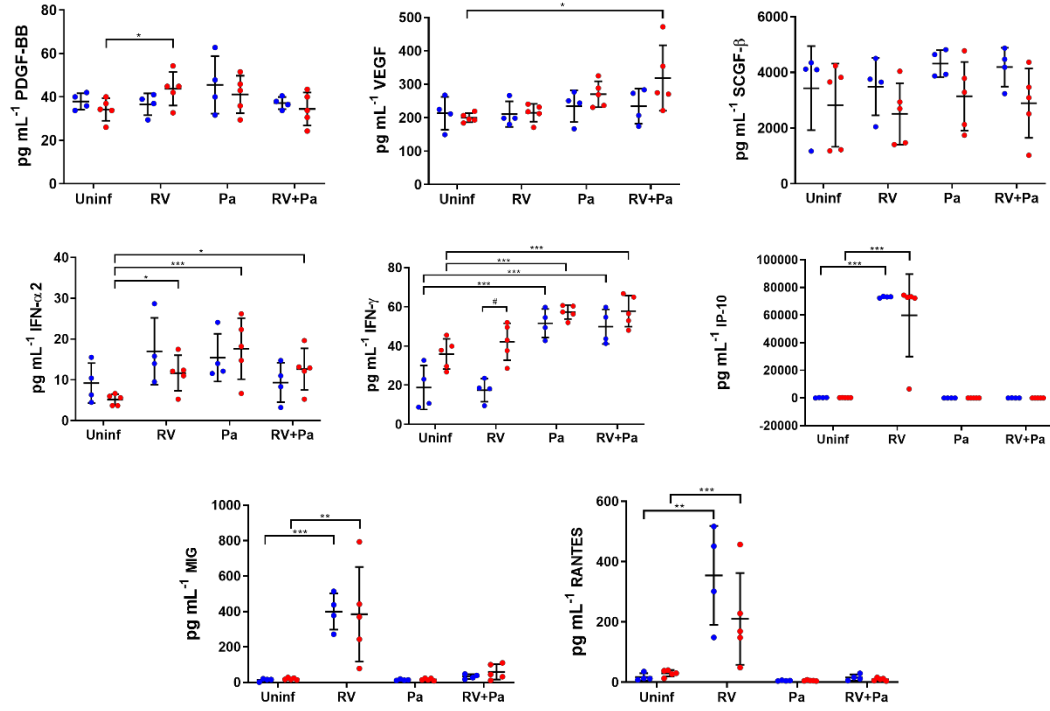

(e)

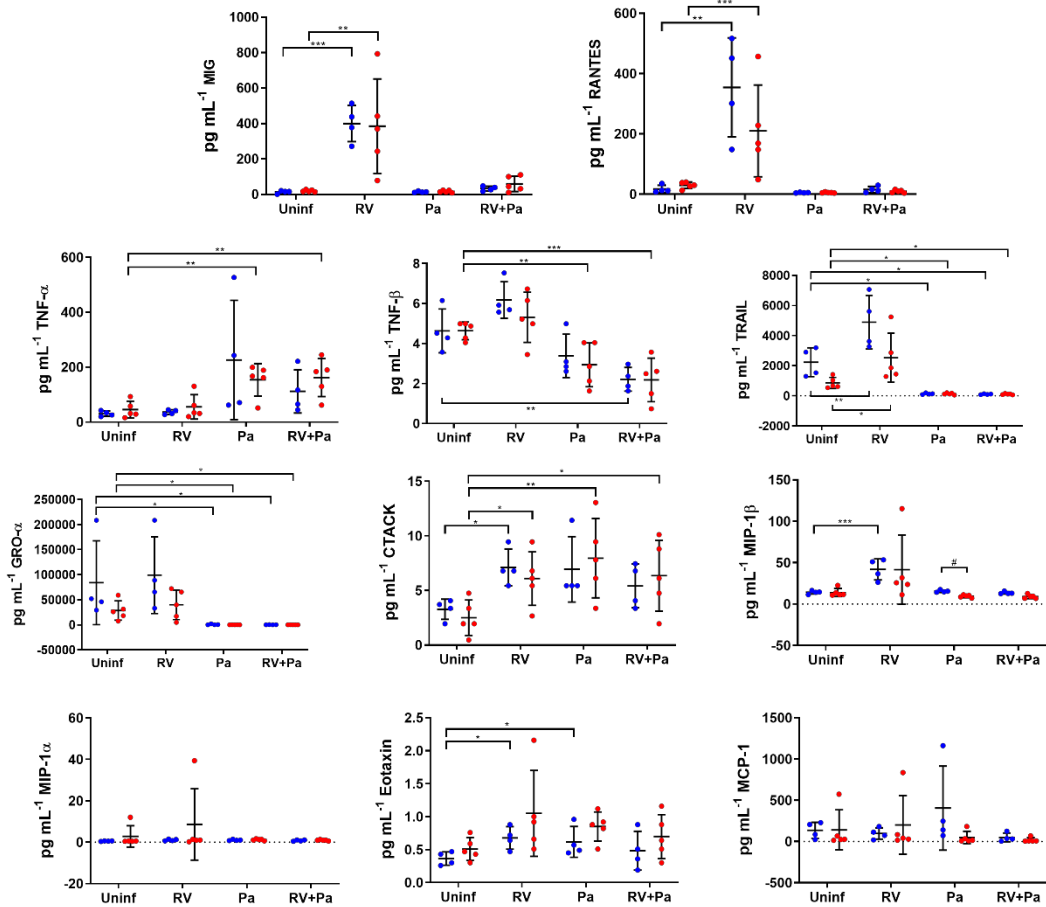



**Supplementary figure 2.** Cytokine concentrations in apical washes of infected and control ALI cultures. Types of cytokines include **(a)** interleukins, **(b)** various stimulatory and inhibitory factors, **(c)** growth factors, **(d)** cytokines associated with antiviral responses, and **(e)** TNF associated cytokines, activators of monocytes, macrophages, and eosinophils, as well as other inflammatory modulators. Results from non-CF cultures are shown in blue, and CF cultures in red. Each point is indicative of results from a single epithelial cell donor (\* $P < 0.05$ , \*\* $P < 0.01$ , \*\*\* $P < 0.001$  compared to uninfected controls, RM one-way ANOVA; # $P < 0.05$  non-CF vs CF,  $t$ -test).

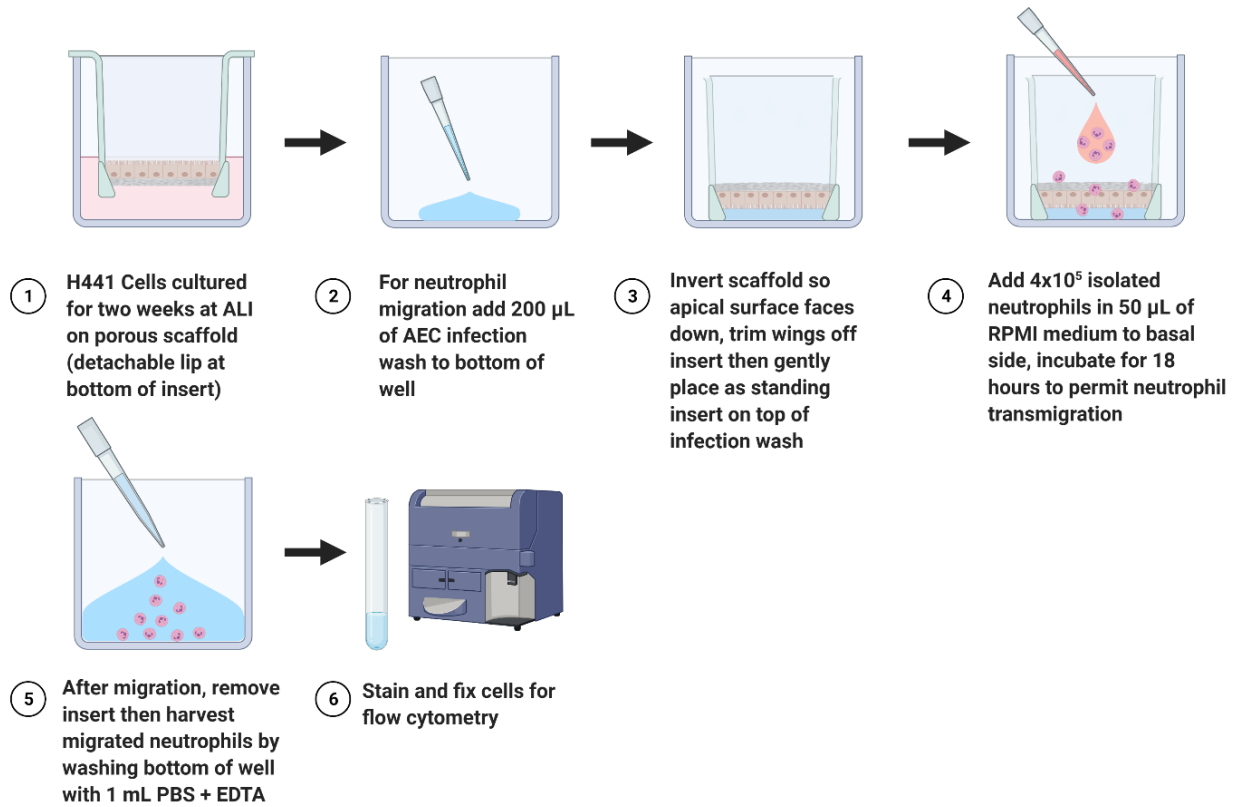

**Supplementary figure 3.** Neutrophil Transmigration Assay (Created with BioRender.com)

(ALI) air liquid interface, (AEC) airway epithelial cell

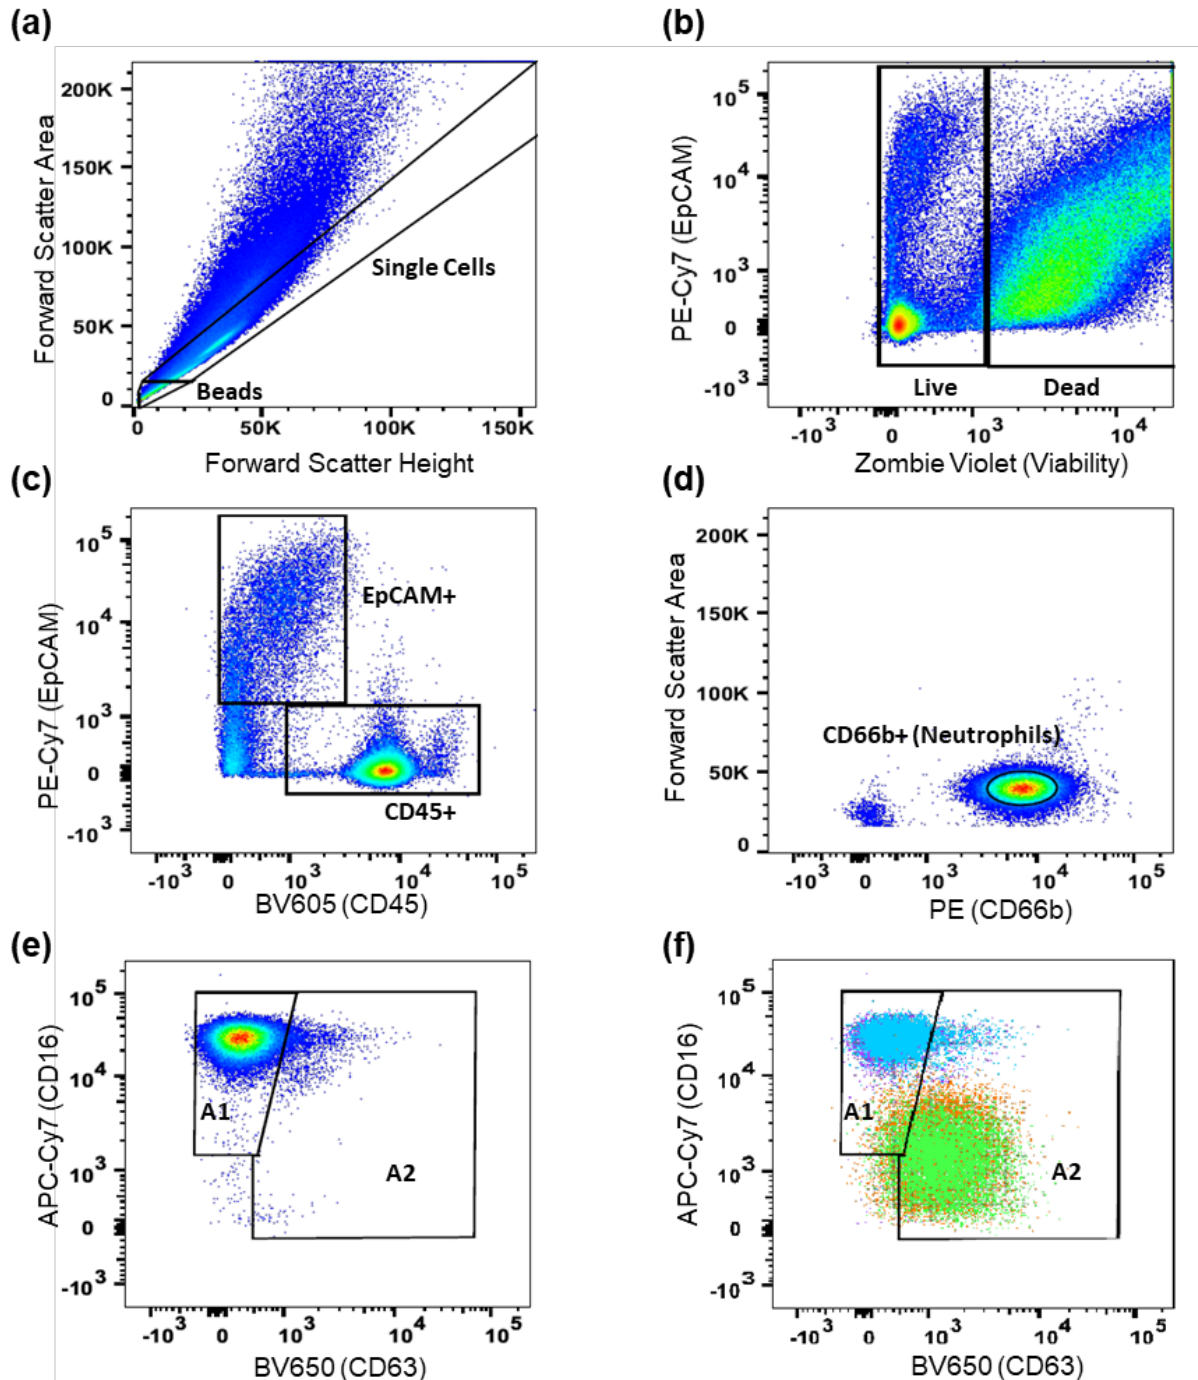

**Supplementary figure 4.** Gating strategy for neutrophil phenotyping. Flow gating strategy starting with **(a)** singlet gate (forward scatter area vs height), **(b)** viability gate (EpCAM vs Zombie Violet viability), **(c)** CD45+ cells (EpCAM vs CD45) and **(d)** CD66b+ neutrophils (forward scatter area vs CD66b). **(e)** A1 vs. A2 (GRIM) populations according to CD16/CD63 expression. **(f)** Example of shifts in neutrophil populations according to type of apical wash used for migration, uninfected (purple), RV (cyan), *Pa* (orange), and RV+*Pa* co-infected (green).

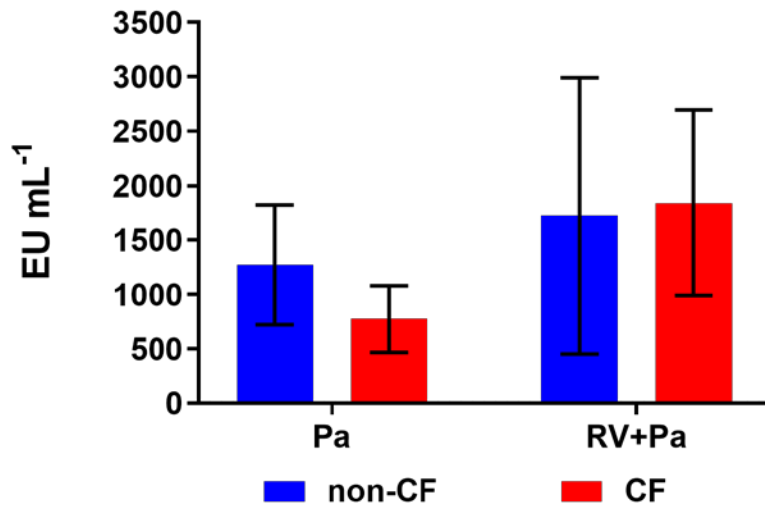

**Supplementary figure 5.** Endotoxin units per mL (EU mL<sup>-1</sup>) of lipopolysaccharide (LPS) in ALI washes from *Pa* infected cultures

**(a)**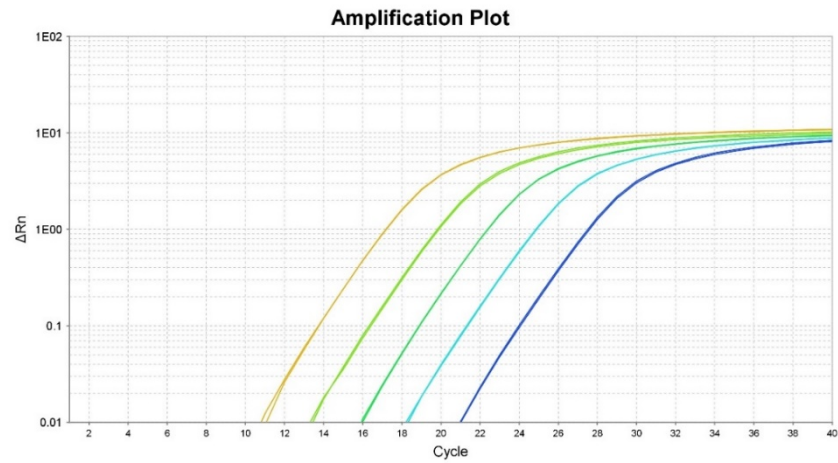**(b)**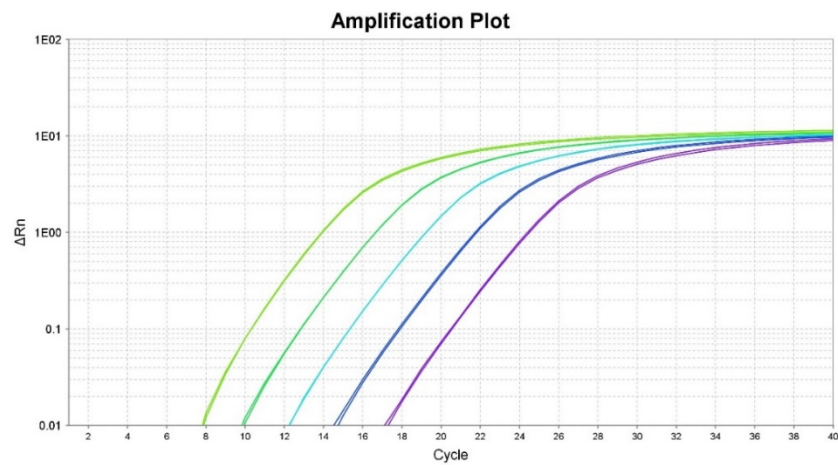

**Supplementary figure 6.** qPCR Amplification pots. **(a)** Standard curve for rhinovirus 5'UTR qPCR in a 1 in 5 dilution series, beginning with amplification corresponding to approximately  $2 \times 10^6$  PFU. **(b)** Standard curve for *P. aeruginosa* 16srRNA qPCR in a 1 in 5 dilution series, beginning with amplification corresponding to approximately  $4 \times 10^8$  CFU.
